# Supplementary material
Source: MDPI journal article supplement (https://www.mdpi.com/2308-3417/8/3/60)
Supplement: s1 [file s1]

# Prediction of In-Hospital Falls Using NRS, PACD Score and FallRS: A Retrospective Cohort Study

Jennifer Siegwart <sup>1,\*,‡</sup>, Umberto Spennato <sup>1,†</sup>, Nathalie Lerjen <sup>1</sup>, Beat Mueller <sup>1,2</sup>, Philipp Schuetz <sup>1,2</sup>, Daniel Koch <sup>1,‡</sup> and Tristan Struja <sup>1,‡</sup>

<sup>1</sup> Medical University Clinic, Kantonsspital Aarau, 5001 Aarau, Switzerland; schuetzph@gmail.com (P.S.)

<sup>2</sup> Medical Faculty, University of Basel, 4001 Basel, Switzerland

\* Correspondence: jennifer.siegwart@gmail.com

† These authors contributed equally to this work.

‡ These authors contributed equally to this work.

VERSION: May8<sup>th</sup> 2023

SUPPLEMENTARY MATERIAL: 11 tables, 2 figures

**Corresponding author and person to whom reprint requests should be addressed:**

Jennifer Siegwart

Medical University Clinic

Kantonsspital Aarau

Tellstrasse 25

CH-5001 Aarau, Switzerland

jennifer.siegwart@gmail.com

**Table S1 Composition of the NRS as presented in the original study (Kondrup 2003)**

| <b>Nutritional status</b>  |                                                                                                                        | <b>Score</b> |
|----------------------------|------------------------------------------------------------------------------------------------------------------------|--------------|
| Normal                     | -                                                                                                                      | 0            |
| Mild                       | weight loss > 5% in 3 months<br>OR<br>food intake below 50-75% of requirement in preceding week                        | 1            |
| Moderate                   | weight loss > 5% in 2 months<br>OR<br>food intake below 25-50% of requirement in preceding week<br>OR<br>BMI 18.5-20.5 | 2            |
| Severe                     | weight loss > 5% in 1 month<br>OR<br>food intake below 0-25% of requirement in preceding week<br>OR<br>BMI < 18.5      | 3            |
| <b>Severity of disease</b> |                                                                                                                        |              |
| Normal                     | -                                                                                                                      | 0            |
| Mild                       | e.g. hip fracture, diabetes                                                                                            | 1            |
| Moderate                   | e.g. pneumonia                                                                                                         | 2            |
| Severe                     | e.g. head injury, intensive care patients                                                                              | 3            |
| <b>Age</b>                 | >70 years                                                                                                              | 1            |

Abbr: NRS (Nutritional Risk Score), BMI (Body Mass Index)

Legend: Add the Score points for a maximum score of 7

**Table S2 Composition of PACD as presented in the original study (Conca, Gabele et al. 2018)**

|                                                                                                                                                                                                                                                                                                                                                                                                                                                  |                |
|--------------------------------------------------------------------------------------------------------------------------------------------------------------------------------------------------------------------------------------------------------------------------------------------------------------------------------------------------------------------------------------------------------------------------------------------------|----------------|
| Number of active medical problems on admission                                                                                                                                                                                                                                                                                                                                                                                                   | Infinite       |
| Person in the same household who can provide help<br>Yes = 0 points, No = 4 points                                                                                                                                                                                                                                                                                                                                                               | Max. 4 points  |
| Number of limitations in ADL (1 point per limitation)<br>Needed help for: <ul style="list-style-type: none"> <li>- Personal hygiene</li> <li>- Dressing/undressing</li> <li>- Toileting</li> <li>- Bathing/showering</li> <li>- Eating/drinking</li> <li>- Moving</li> <li>- Transfer (bed/chair)</li> <li>- Car or public transportation</li> <li>- Shopping</li> <li>- Cooking</li> <li>- Homework</li> <li>- Medication management</li> </ul> | Max. 12 points |
| Age (years)<br><60 = 0 points<br>≥60 = 1 point<br>≥70 = 2 points<br>≥80 = 3 points<br>≥90 = 4 points<br>≥100 = 5 points                                                                                                                                                                                                                                                                                                                          | Max. 5 points  |

Abbr: PACD (Post Acute Care Discharge Score), ADL (Activities of Daily Living)

Legend: Add all points for the score of your patient. Because there is no maximum number of medical problems, the score potentially ranges to infinity.

**Table S3 Composition of DOS as presented in the original study (Marieke J Schuurmans 2003)**

| Observation                                         | No (points) | Yes (points) |
|-----------------------------------------------------|-------------|--------------|
| Falls asleep during conversation                    | 0           | 1            |
| Quickly distracted by environmental stimuli         | 0           | 1            |
| Remains attentive to the conversation or the action | 1           | 0            |
| Does not finish questions or answers                | 0           | 1            |
| gives inappropriate responses to questions          | 0           | 1            |
| Reacts slowly to orders                             | 0           | 1            |
| Missing local orientation                           | 0           | 1            |
| Knows daytime                                       | 1           | 0            |
| Remembers recent events                             | 1           | 0            |
| Restlessness                                        | 0           | 1            |
| Pulls on installations                              | 0           | 1            |
| Reacts inappropriate emotional                      | 0           | 1            |
| Visual, auditory or olfactory hallucinations        | 0           | 1            |

Abbr: DOS (Delirium Observation Screening Scale)

Legend: Add the points for a maximum score of 13.

**Table S4 Predictive ability for in-hospital fall of DOS. Derivation years 2016 – 2019 and validation years 2020 – 2022.**

|            | <b>Derivation 2016-2019<br/>AUC (95% CI)</b> | <b>Validation 2020-2022<br/>AUC (95% CI)</b> | <b>P-value</b> |
|------------|----------------------------------------------|----------------------------------------------|----------------|
| <b>DOS</b> | 0. 58 (0.48 – 0.67)                          | 0.63 (0.60 – 0.67)                           | 0.04           |

Abbr: AUC (Area under curve), CI (confidence interval), DOS (delirium observation screening scale)

**Table S5 Calibration for NRS (nutritional risk screening)**

| NRS | Probability (%) | Observed Falls | Expected Falls | Total Sample |
|-----|-----------------|----------------|----------------|--------------|
| 0   | 1.8             | 6              | 12.8           | 706          |
| 1   | 2.3             | 31             | 35.4           | 1,517        |
| 2   | 3.0             | 60             | 49.3           | 1,649        |
| 3   | 3.8             | 40             | 34.1           | 891          |
| 4   | 4.9             | 31             | 25.9           | 530          |
| 5   | 6.2             | 13             | 20.8           | 335          |
| 6   | 7.9             | 5              | 7.6            | 97           |
| 7   | 9.9             | 1              | 1.1            | 11           |

**Table S6 Calibration for DOS (delirium observation screening scale)**

| DOS | Probability (%) | Observed Falls | Expected Falls | Total Sample |
|-----|-----------------|----------------|----------------|--------------|
| 1   | 3.0             | 102            | 120.4          | 4,080        |
| 2   | 3.5             | 24             | 18.1           | 511          |
| 3   | 4.2             | 25             | 14.8           | 351          |
| 4   | 5.0             | 16             | 9.9            | 196          |
| 5   | 6.0             | 11             | 9.4            | 157          |
| 6   | 7.2             | 11             | 9.4            | 132          |
| 7   | 8.5             | 9              | 8.4            | 99           |
| 8   | 10.0            | 5              | 8.5            | 85           |
| 9   | 11.9            | 4              | 6.8            | 57           |
| 10  | 13.9            | 7              | 7.1            | 51           |
| 11  | 16.3            | 5              | 4.1            | 25           |
| 12  | 19.0            | 1              | 2.3            | 12           |
| 13  | 22.0            | 1              | 1.5            | 7            |
| 14  | 25.4            | 0              | 0.3            | 1            |

**Table S7 Calibration for FallRS (Fall Risk Score)**

| FallRS | Probability % | Observed Falls | Expected Falls | Total Sample |
|--------|---------------|----------------|----------------|--------------|
| 0      | 1.3           | 0              | 0.0            | 2            |
| 1      | 1.5           | 0              | 0.9            | 64           |
| 2      | 1.6           | 0              | 2.6            | 159          |
| 3      | 1.8           | 3              | 2.5            | 139          |
| 4      | 2.0           | 1              | 2.8            | 139          |
| 5      | 2.2           | 5              | 3.9            | 176          |
| 6      | 2.4           | 4              | 4.8            | 199          |
| 7      | 2.7           | 5              | 4.5            | 166          |
| 8      | 3.0           | 5              | 5.1            | 170          |
| 9      | 3.3           | 6              | 4.2            | 127          |
| 10     | 3.7           | 4              | 4.4            | 121          |
| 11     | 4.0           | 7              | 4.0            | 98           |
| 12     | 4.5           | 5              | 4.2            | 95           |
| 13     | 4.9           | 5              | 3.7            | 74           |
| 14     | 5.5           | 3              | 2.8            | 52           |
| 15     | 6.0           | 5              | 4.3            | 71           |
| 16     | 6.6           | 4              | 3.7            | 55           |
| 17     | 7.3           | 2              | 3.7            | 50           |
| 18     | 8.1           | 6              | 3.0            | 37           |
| 19     | 8.9           | 2              | 2.1            | 24           |
| 20     | 9.8           | 2              | 4.0            | 41           |
| 21     | 10.7          | 1              | 3.0            | 28           |
| 22     | 11.8          | 2              | 2.0            | 17           |
| 23     | 12.9          | 2              | 1.9            | 15           |
| 24     | 14.1          | 2              | 1.7            | 12           |
| 25     | 15.5          | 1              | 1.2            | 8            |
| 26     | 16.9          | 0              | 1.7            | 10           |
| 27     | 18.4          | 1              | 0.6            | 3            |
| 28     | 20.0          | 0              | 0.2            | 1            |
| 29     | 21.7          | 1              | 0.7            | 3            |

**Table S8 Calibration for PACD (Post-Acute Care Discharge score)**

| PACD | Probability (%) | Observed Falls | Expected Falls | Total Sample |
|------|-----------------|----------------|----------------|--------------|
| 0    | 1.6             | 0              | 0.0            | 3            |
| 1    | 1.7             | 2              | 4.8            | 281          |
| 2    | 1.9             | 4              | 5.5            | 290          |
| 3    | 2.1             | 2              | 6.6            | 314          |
| 4    | 2.3             | 10             | 6.5            | 283          |
| 5    | 2.6             | 5              | 6.3            | 246          |
| 6    | 2.8             | 7              | 5.1            | 182          |
| 7    | 3.1             | 5              | 4.9            | 156          |
| 8    | 3.4             | 9              | 5.1            | 150          |
| 9    | 3.8             | 7              | 4.3            | 115          |
| 10   | 4.2             | 6              | 5.2            | 124          |
| 11   | 4.6             | 5              | 3.6            | 79           |
| 12   | 5.1             | 5              | 4.9            | 96           |
| 13   | 5.6             | 4              | 4.1            | 73           |
| 14   | 6.1             | 5              | 3.9            | 64           |
| 15   | 6.7             | 3              | 4.3            | 64           |
| 16   | 7.4             | 6              | 4.1            | 56           |
| 17   | 8.1             | 4              | 4.8            | 59           |
| 18   | 8.9             | 2              | 3.1            | 35           |
| 19   | 9.8             | 1              | 3.1            | 32           |
| 20   | 10.7            | 1              | 2.6            | 24           |
| 21   | 11.7            | 1              | 2.0            | 17           |
| 22   | 12.8            | 2              | 0.9            | 7            |
| 23   | 14.0            | 0              | 0.7            | 5            |
| 24   | 15.3            | 0              | 0.5            | 3            |
| 25   | 16.6            | 2              | 1.0            | 6            |



**Table S9 Final multivariable model for NRS from validation data from 2018-2020**

$$\text{Probability} = \frac{e^{(\beta_0 + \beta_1 \cdot \text{var1} + \beta_2 \cdot \text{var2} + \text{etc})}}{1 + e^{(\beta_0 + \beta_1 \cdot \text{var1} + \beta_2 \cdot \text{var2} + \text{etc})}}$$

| Fall and NRS                        | Beta-Coefficient | OR        | 95% Conf. Interval |           |
|-------------------------------------|------------------|-----------|--------------------|-----------|
| <b>NRS</b>                          | 0.09997          | 1.105137  | 0.9547286          | 1.27924   |
| <b>Age</b>                          | 0.01669          | 1.016835  | 0.9981085          | 1.035913  |
| <b>Elixhauser comorbidity index</b> | 0.16086          | 1.174522  | 1.027319           | 1.342818  |
| <b>Frailty score</b>                | 0.11456          | 1.121378  | 1.061937           | 1.184146  |
| <b>Gender</b>                       | -0.69627         | 0.498439  | 0.3123563          | 0.7953785 |
| <b>Intercept</b>                    | -5.78050         | 0.0030872 | 0.0008177          | 0.0116554 |

**Table S10 Final multivariable model for PACD from validation data from 2018-2020**

| Fall and PACD                       | Beta-Coefficient | OR        | 95% Conf. Interval |            |
|-------------------------------------|------------------|-----------|--------------------|------------|
| <b>PACD</b>                         | 0.0220483        | 1.022293  | -0.0260982         | 0.0701949  |
| <b>Age</b>                          | 0.0190903        | 1.019274  | -0.0016873         | 0.0398679  |
| <b>Elixhauser comorbidity index</b> | 0.1930107        | 1.212896  | 0.0617039          | 0.3243175  |
| <b>Frailty score</b>                | 0.1157946        | 1.122765  | 0.0574712          | 0.174118   |
| <b>Gender</b>                       | -0.719912        | 0.4867951 | -1.191087          | -0.2487368 |
| <b>Intercept</b>                    | -5.873976        | 0.0028117 | -7.290627          | -4.457325  |

**Table S11 Final multivariable model for DOS from validation data from 2018-2020**

| Fall and DOS                        | Beta-Coefficient | OR        | 95% Conf. Interval |           |
|-------------------------------------|------------------|-----------|--------------------|-----------|
| <b>DOS</b>                          | 0.0380328        | 1.038765  | 0.855245           | 1.261666  |
| <b>Age</b>                          | 0.0485518        | 1.04975   | 0.9838168          | 1.120101  |
| <b>Elixhauser comorbidity index</b> | 0.2086366        | 1.231997  | 0.8468074          | 1.7924    |
| <b>Frailty score</b>                | 0.0644411        | 1.066563  | 0.9048786          | 1.257137  |
| <b>Gender</b>                       | -2.347167        | 0.0956397 | 0.0145744          | 0.6276051 |
| <b>Intercept</b>                    | -7.691481        | 0.0004567 | 1.81E-06           | 0.1153605 |

Figure S1 ROC curves for accuracy of predicting fall in unadjusted models

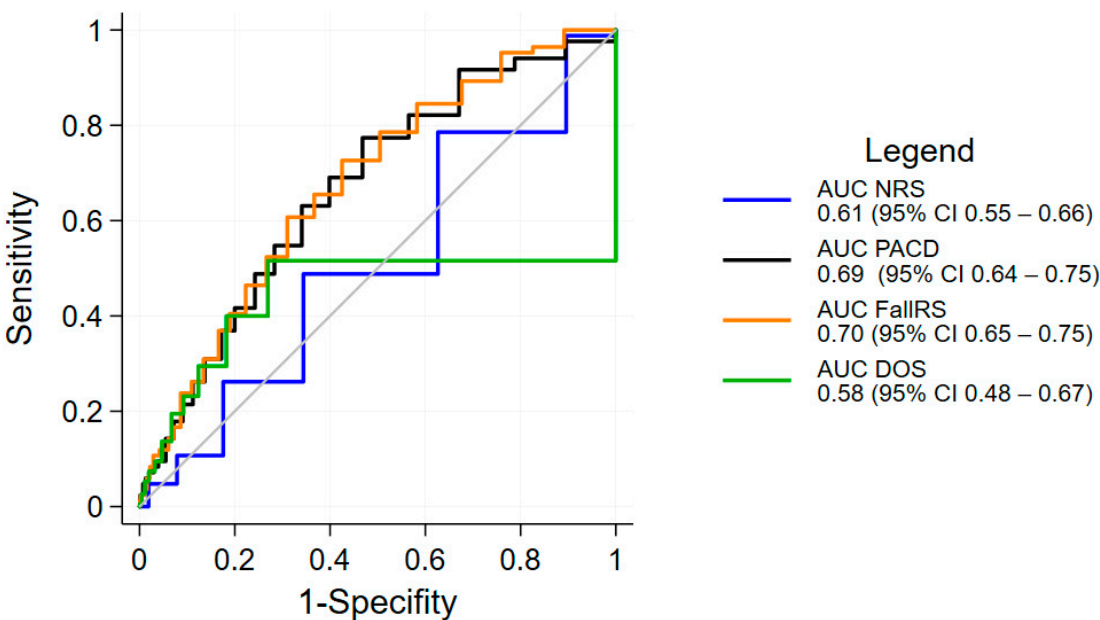

Abbr.: AUC (Area under curve), CI (confidence interval), NRS (nutritional risk screening), DOS (delirium observation screening scale), PACD (post-acute care discharge), FallRS (Fall Risk Score)

**Figure S2 ROC curves for accuracy of predicting fall in adjusted models. Adjusted for age, gender, Elixhauser comorbidity index, Frailty score.**

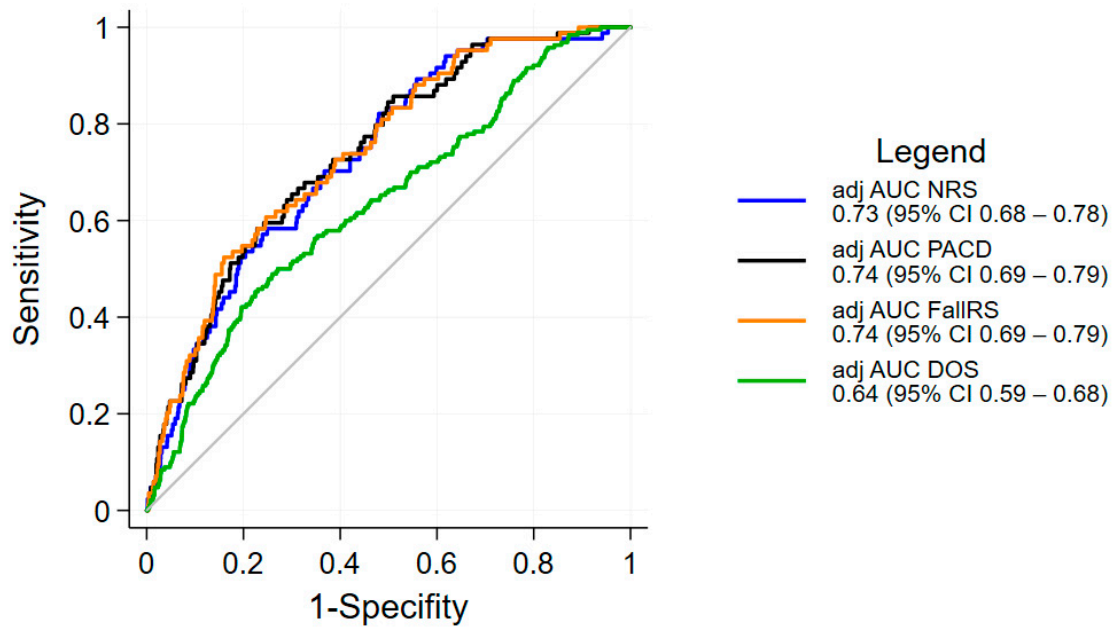

Abbr.: AUC (Area under curve), CI (confidence interval), NRS (nutritional risk screening), DOS (delirium observation screening scale), PACD (post-acute care discharge), FallRS(Fall Risk Score)

## References

Conca, A., et al. (2018). "Prediction of post-acute care demand in medical and neurological inpatients: diagnostic assessment of the post-acute discharge score - a prospective cohort study." BMC Health Serv Res **18**(1): 111.

Kondrup, J. (2003). "Nutritional risk screening (NRS 2002): a new method based on an analysis of controlled clinical trials." Clinical Nutrition **22**(3): 321-336.

Marieke J Schuurmans 1, L. M. S.-B., Sijmen A Duursma (2003). "The Delirium Observation Screening Scale: a screening instrument for delirium." Research and theory for nursing practice.
